# Supplementary material for: MoS2 coated CoS2 nanocomposites as counter electrodes in Pt-free dye-sensitized solar cells
Source: Royal Society of Chemistry journal article supplement (doi:10.1039/c9cp04592a), 2019-01-01
Supplement: c9cp04592a1.pdf [file c9cp04592a1.pdf]

## MoS<sub>2</sub> coated CoS<sub>2</sub> nanocomposites as Counter Electrode in Pt-free Dye-sensitized Solar Cells

Vijaya Subbiah<sup>a</sup>, Giovanni Landi,<sup>b,c</sup> Jerry J. Wu,<sup>d</sup> Sambandam Anandan<sup>a,\*</sup>

<sup>a</sup>*Nanomaterials & Solar Energy Conversion Lab, Department of Chemistry, National Institute of Technology, Tiruchirappalli -620015, India.*

<sup>b</sup>Institute for Polymers, Composites and Biomaterials (IPCB) – CNR, P.le E. Fermi 1, Portici, Naples, Italy.

<sup>c</sup>ENEA, Casaccia Research Centre, Via Anguillarese 301, 00123, Rome, Italy.

<sup>d</sup>Department of Environmental Engineering and Science, Feng Chia University, Taichung 407, Taiwan

\*To whom correspondence should be addressed: E-mail: [sanand@nitt.edu](mailto:sanand@nitt.edu),  
Tel.: +91- 431-2503639, Fax: +91-431-2500133.

### Supplementary Information

Figure. S1 FE-SEM images of (a, b) CoS<sub>2</sub> (c, d) MoS<sub>2</sub> coated CoS<sub>2</sub> nanocomposite

Figure. S2 SEM images of MoS<sub>2</sub>

Figure. S3 SAED pattern of CoS<sub>2</sub> (a), MoS<sub>2</sub> coated CoS<sub>2</sub> (b), elemental mapping of MoS<sub>2</sub> coated CoS<sub>2</sub> nanocomposite (c, d, e, f)

Figure. S4 (a) HR-TEM image of CoS<sub>2</sub> (b) Raman spectra of MoS<sub>2</sub> and MoS<sub>2</sub> coated CoS<sub>2</sub> nanocomposite

Figure. S5 Nyquist plots of DSSCs fabricated with (a) Pt (b) CoS<sub>2</sub> (c) MoS<sub>2</sub> coated CoS<sub>2</sub> CEs under dark and illumination conditions

Figure. S6 Bode-phase plots of DSSCs fabricated with Pt, CoS<sub>2</sub>, and MoS<sub>2</sub> coated CoS<sub>2</sub> CEs (a) under dark (b) illumination conditions.

Figure. S7 Tafel plot of dummy cells fabricated with Pt, CoS<sub>2</sub>, and MoS<sub>2</sub> coated CoS<sub>2</sub> CEs.

Figure. S8 EQE spectra of DSSCs fabricated with Pt, CoS<sub>2</sub> and MoS<sub>2</sub> coated CoS<sub>2</sub> nanocomposite CEs respectively.

Figure. S9 (a) J-V plot, (b) Nyquist plot, (c) Bode-Phase plot, (d) EQE plot of DSSCs with MoS<sub>2</sub> CE

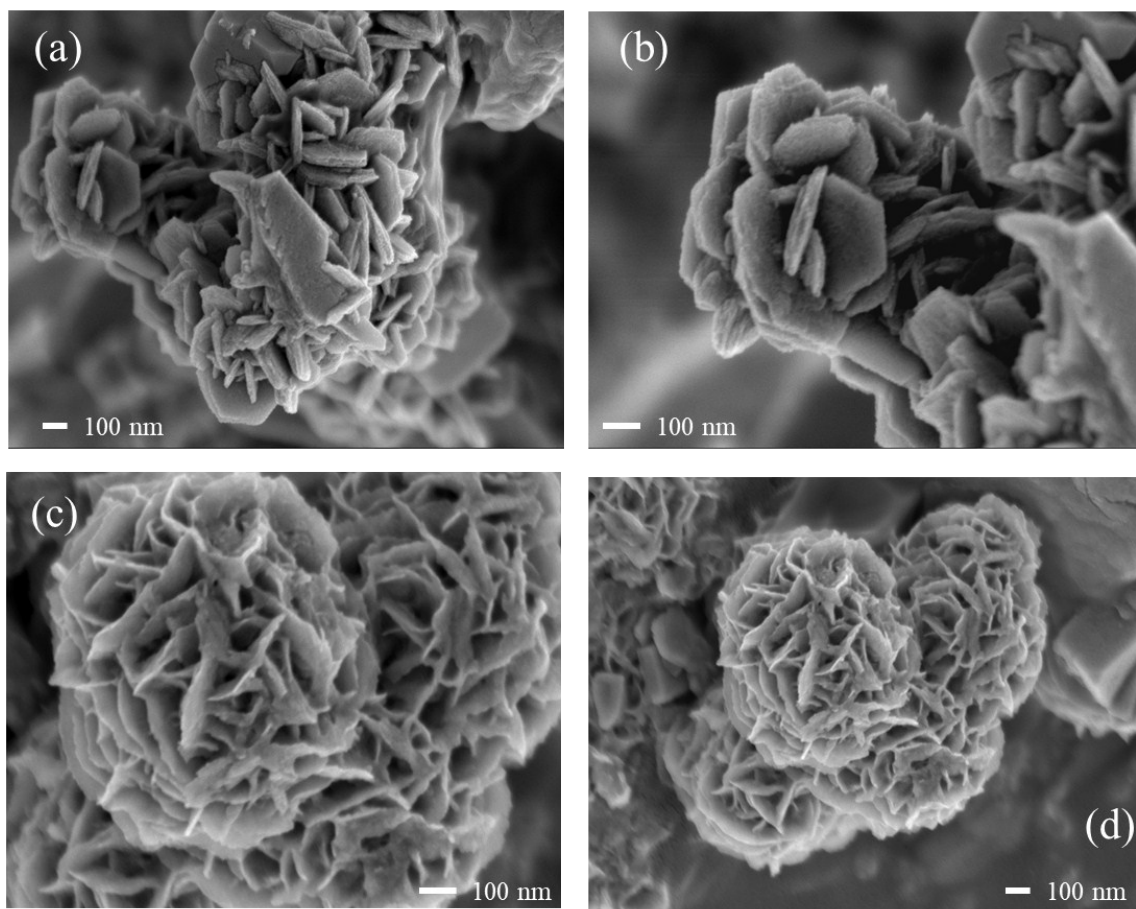

Figure S1. FE-SEM images of (a, b) CoS<sub>2</sub> (c, d) MoS<sub>2</sub> coated CoS<sub>2</sub> nanocomposite, respectively.

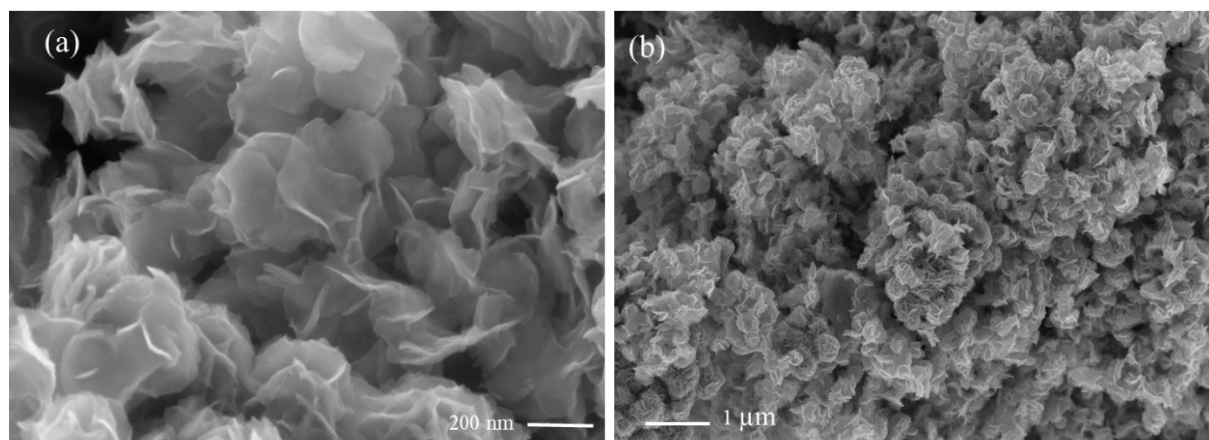

Figure S2. SEM images of MoS<sub>2</sub>

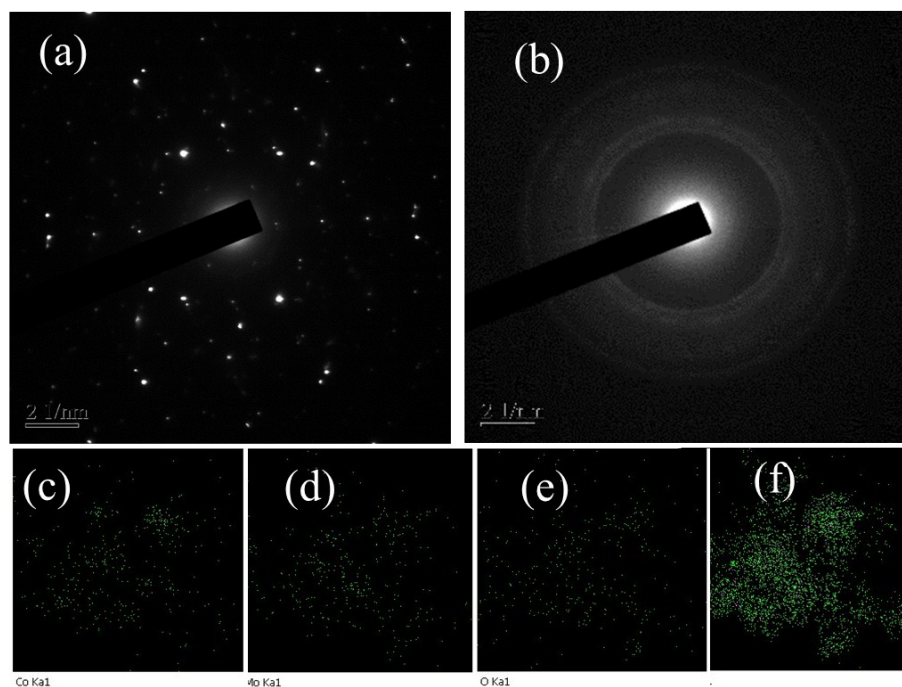

Figure S3. SAED pattern of  $\text{CoS}_2$  (a),  $\text{MoS}_2$  coated  $\text{CoS}_2$  (b), elemental mapping of  $\text{MoS}_2$  coated  $\text{CoS}_2$  nanocomposite (c, d, e, f)

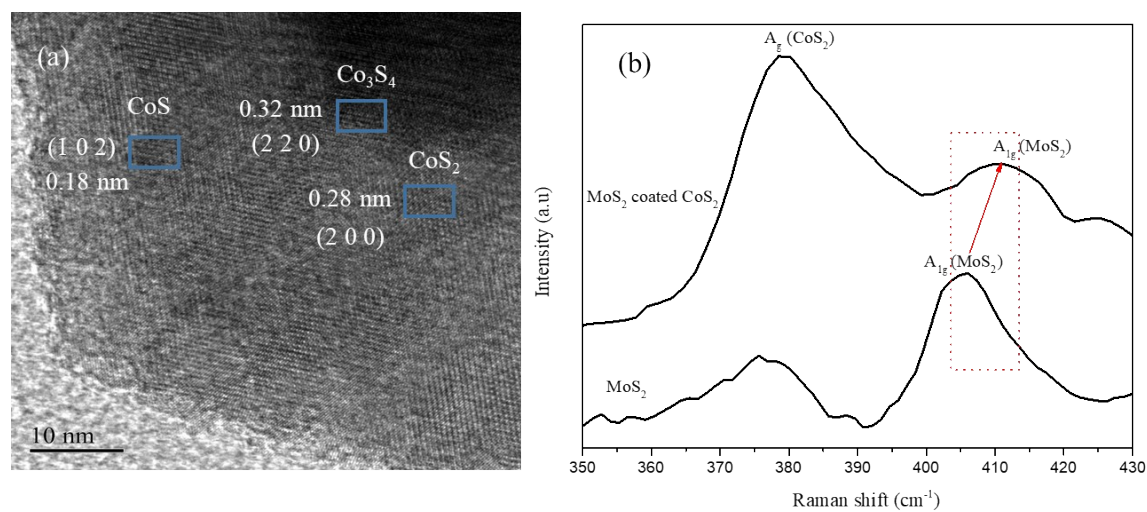

Figure S4. (a) HR-TEM image of  $\text{CoS}_2$  (b) Raman spectra of  $\text{MoS}_2$  and  $\text{MoS}_2$  coated  $\text{CoS}_2$  nanocomposite

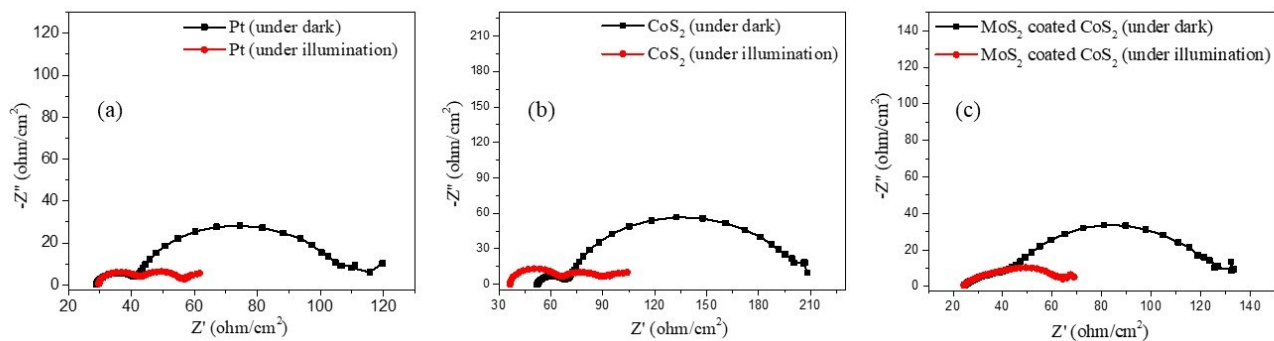

Figure S5. Nyquist plots of DSSCs fabricated with (a) Pt (b) CoS<sub>2</sub> (c) MoS<sub>2</sub> coated CoS<sub>2</sub> CEs under dark and illumination conditions

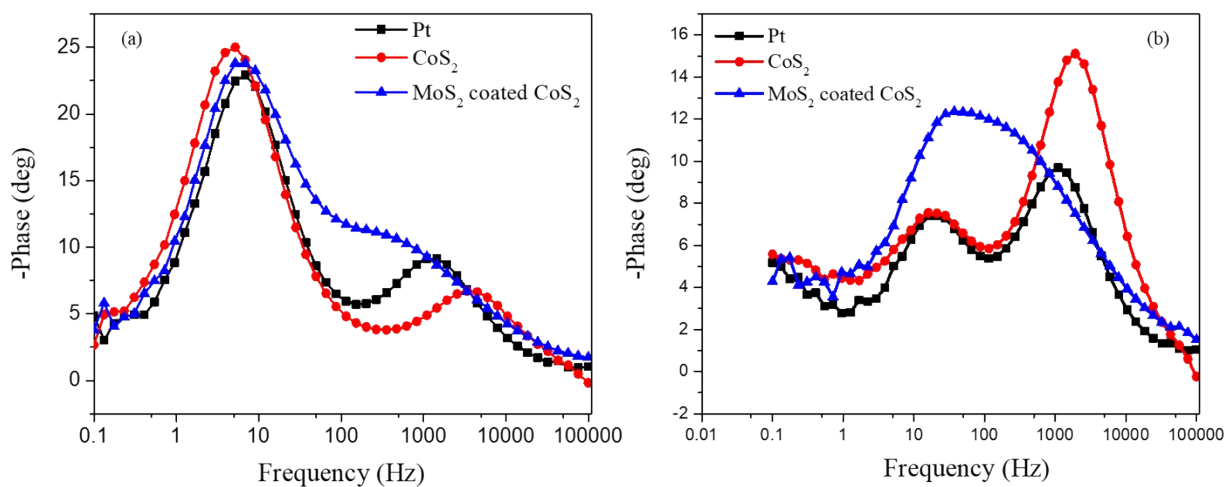

Figure S6. Bode-phase plots of DSSCs fabricated with Pt, CoS<sub>2</sub>, and MoS<sub>2</sub> coated CoS<sub>2</sub> CEs (a) under dark and (b) under illumination conditions.

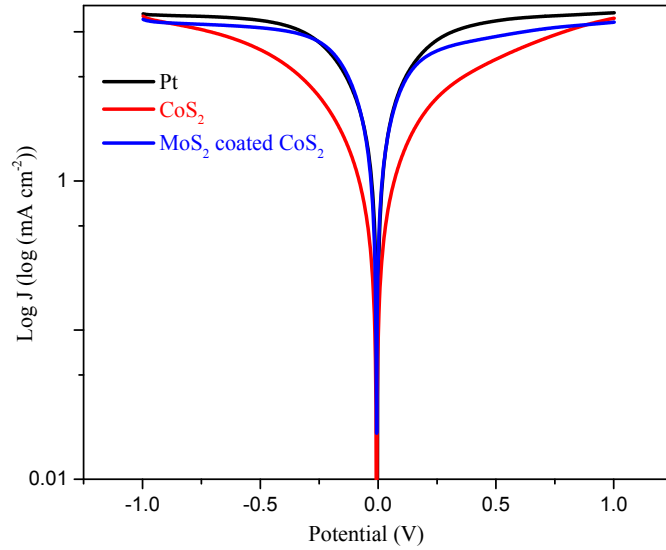

Figure S7. Tafel plot of dummy cells fabricated with Pt, CoS<sub>2</sub>, and MoS<sub>2</sub> coated CoS<sub>2</sub> CEs.

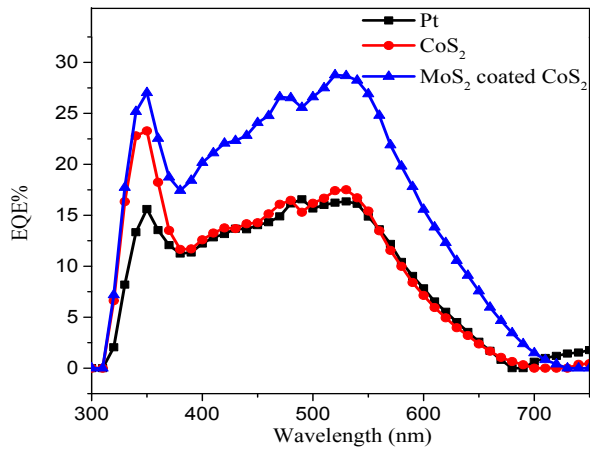

Figure S8. EQE spectra of DSSCs fabricated with Pt, CoS<sub>2</sub> and MoS<sub>2</sub> coated CoS<sub>2</sub> nanocomposite CEs respectively.

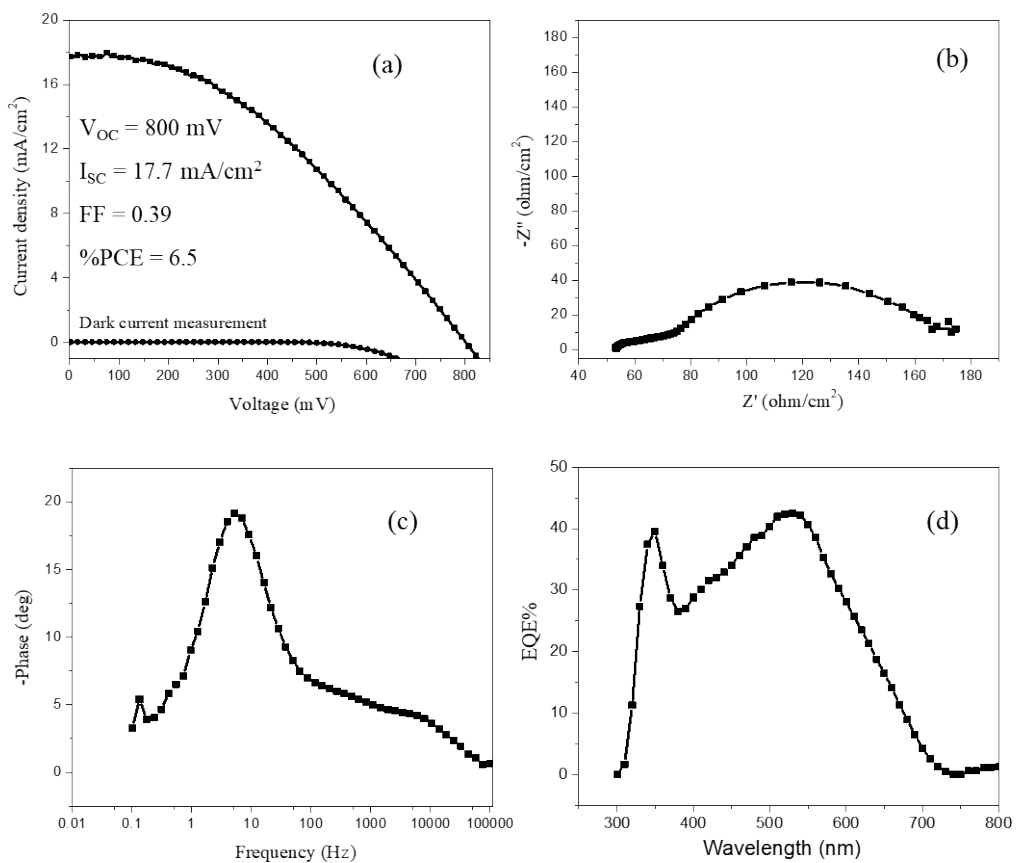

Figure S9. (a) J-V plot with parameters inset, (b) Nyquist plot, (c) Bode-Phase plot, and (d) EQE spectra of DSSCs with MoS<sub>2</sub> CE.
